# Supplementary material for: Sensitivity of human pleural mesothelioma to oncolytic measles virus depends on defects of the type I interferon response
Source: PubMed Central journal article supplement (PMC4792599; doi:10.18632/oncotarget.6285), 2015-11-02
Supplement: oncotarget-06-44892-s001.pdf [file oncotarget-06-44892-s001.pdf]

# Sensitivity of human pleural mesothelioma to oncolytic measles virus depends on defects of the type I interferon response

## Supplementary Material

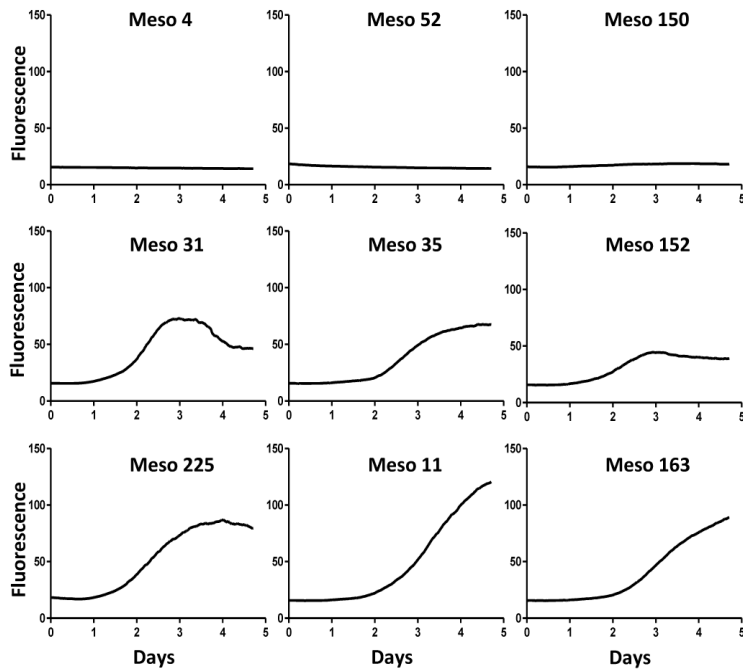

**Supplemental figure 1. MV replication measured by time-lapse video microscopy.** MPM cell lines were infected with MV-eGFP at MOI=1. Fluorescence microscopy video was performed with a picture taken every 30 minutes with a Leica DMI6000B microscope with a 10x objective. The fluorescence values correspond to the mean of GFP fluorescence measured per field. Results are expressed as the mean of four randomly selected fields.

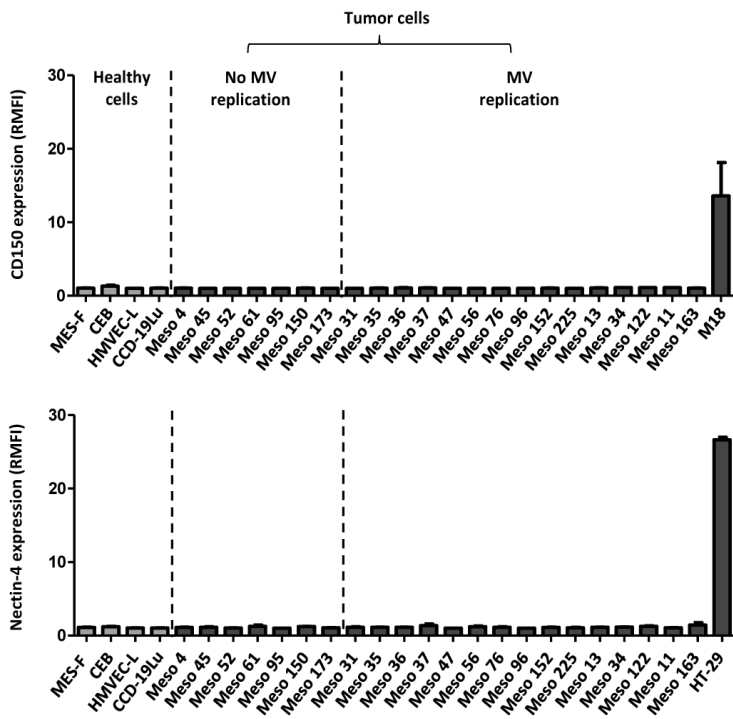

**Supplemental figure 2. MPM tumor cell lines and healthy cells do not express CD150 and nectin-4 at their surface.** Expression of CD150 and nectin-4 was measured on the cell surface by flow cytometry. Melanoma M18 and colorectal adenocarcinoma HT29 tumor cells were used as positive controls for the expression of CD150 and nectin-4, respectively. The results are expressed as the RMFI mean $\pm$ SEM of three independent experiments.

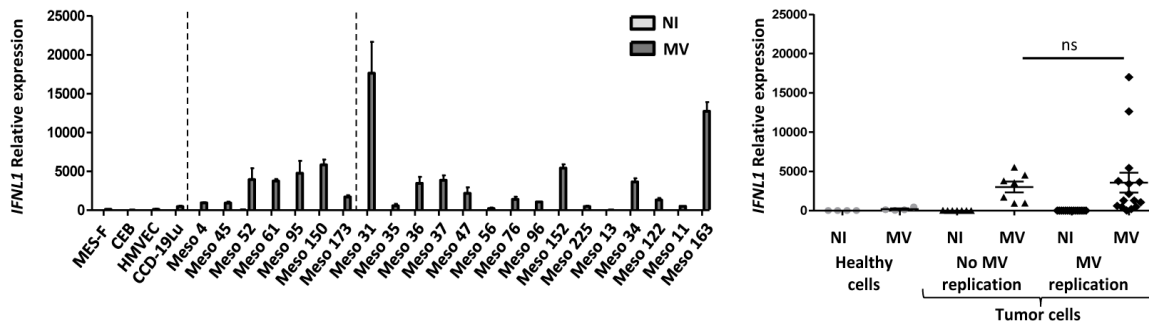

**Supplemental figure 3. The sensitivity to MV infection does not depend on defects of the antiviral type III IFN response.** The expression of the gene *IFNL1* coding for IFN- $\lambda$ 1, implicated in the antiviral type III IFN response, was analyzed by RT-qPCR 72h after MV infection of tumor and healthy cells (MOI=1). The expression is expressed as relative expression compared to *RPLPO* gene expression. Non-infected cells (NI) are in light gray and infected cells (MV) are in dark gray. A histogram shows the expression by each cell line, and a scatter plot shows the expression by groups (healthy cells, tumor cells with no MV replication, tumor cells with MV replication). Results are expressed as the mean  $\pm$ SEM of three independent experiments. \*  $p < 0.05$ ; \*\*  $p < 0.01$ ; \*\*\*  $p < 0.001$ , one-way ANOVA (Kruskal-Wallis).
